# Supplementary material for: The Impact of an Enrichment Program on the Emirati Verbally Gifted Children
Source: MDPI journal article supplement (doi:10.3390/jintelligence10030068), 2022-09-15
Supplement: s1 [file s1]

**Table S1. The pre-test scores (*out of 45*) before the implementation of the enrichment program**

| <b>Experimental Group Students No.</b> | <b>Experimental Class</b> | <b>Control Group Students No.</b> | <b>Control Class</b> |
|----------------------------------------|---------------------------|-----------------------------------|----------------------|
| Student 1                              | 35                        | Student 1                         | 31                   |
| Student 2                              | 34                        | Student 2                         | 35                   |
| Student 3                              | 32                        | Student 3                         | 30                   |
| Student 4                              | 31                        | Student 4                         | 39                   |
| Student 5                              | 38                        | Student 5                         | 24                   |
| Student 6                              | 33                        | Student 6                         | 25                   |
| Student 7                              | 25                        | Student 7                         | 30                   |
| Student 8                              | 30                        | Student 8                         | 20                   |
| Student 9                              | 31                        | Student 9                         | 23                   |
| Student 10                             | 31                        | Student 10                        | 38                   |
| Student 11                             | 32                        | Student 11                        | 30                   |
| Student 12                             | 35                        | Student 12                        | 35                   |
| Student 13                             | 33                        | Student 13                        | 32                   |
| Student 14                             | 35                        | Student 14                        | 29                   |
| Student 15                             | 33                        | Student 15                        | 33                   |
| Student 16                             | 37                        | Student 16                        | 40                   |
| Student 17                             | 38                        | Student 17                        | 39                   |
| Student 18                             | 33                        | Student 18                        | 37                   |
| Student 19                             | 30                        | Student 19                        | 38                   |
| Student 20                             | 28                        | Student 20                        | 38                   |
| <b>TOTAL</b>                           | <b>654</b>                | <b>TOTAL</b>                      | <b>646</b>           |
| MEAN                                   | 32.7                      | MEAN                              | 32.3                 |

**Table S2. The post-test scores (*out of 45*) after the implementation of the enrichment program**

| <b>Experimental Group Students No.</b> | <b>Experimental Class</b> | <b>Control Group Students No.</b> | <b>Control Class</b> |
|----------------------------------------|---------------------------|-----------------------------------|----------------------|
| Student 1                              | 43                        | Student 1                         | 33                   |
| Student 2                              | 40                        | Student 2                         | 38                   |
| Student 3                              | 40                        | Student 3                         | 30                   |
| Student 4                              | 35                        | Student 4                         | 40                   |
| Student 5                              | 40                        | Student 5                         | 30                   |
| Student 6                              | 43                        | Student 6                         | 23                   |
| Student 7                              | 40                        | Student 7                         | 32                   |
| Student 8                              | 35                        | Student 8                         | 21                   |
| Student 9                              | 40                        | Student 9                         | 25                   |
| Student 10                             | 43                        | Student 10                        | 40                   |
| Student 11                             | 40                        | Student 11                        | 28                   |
| Student 12                             | 40                        | Student 12                        | 40                   |
| Student 13                             | 35                        | Student 13                        | 25                   |
| Student 14                             | 42                        | Student 14                        | 30                   |
| Student 15                             | 42                        | Student 15                        | 31                   |
| Student 16                             | 40                        | Student 16                        | 30                   |
| Student 17                             | 43                        | Student 17                        | 40                   |
| Student 18                             | 40                        | Student 18                        | 35                   |
| Student 19                             | 42                        | Student 19                        | 33                   |
| Student 20                             | 43                        | Student 20                        | 40                   |
| <b>TOTAL</b>                           | <b>806</b>                | <b>TOTAL</b>                      | <b>644</b>           |
| MEAN                                   | 40.30                     | MEAN                              | 32.24                |
